# Supplementary material for: Association of HIV diversity and virologic outcomes in early antiretroviral treatment: HPTN 052
Source: PubMed Central journal article supplement (PMC5421787; doi:10.1371/journal.pone.0177281), 2017-05-08
Supplement: pone.0177281.s001.pdf [file pone.0177281.s001.pdf]

**S1 Fig. Distribution of baseline ENV2 HRM scores by geographical region.**

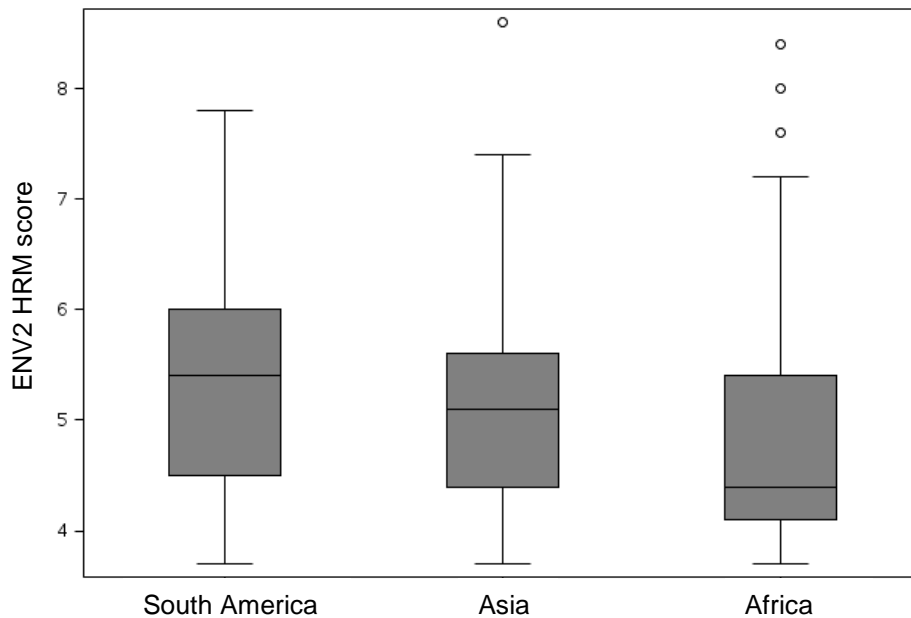

**Legend for S1 Fig**

The box plot shows the distribution of ENV2 HRM scores by geographical region (South America [n=17], Asia [n=26], and Africa [n=43]). Median (interquartile range [IQR]) ENV2 HRM scores were 5.4 (4.5, 6.0) for South America, 5.1 (4.4, 5.6) for Asia, and 4.4 (4.1, 5.4) for Africa.

Abbreviations: HRM: high resolution melting.
