# Supplementary material for: Association of HIV diversity and virologic outcomes in early antiretroviral treatment: HPTN 052
Source: PubMed Central journal article supplement (PMC5421787; doi:10.1371/journal.pone.0177281), 2017-05-08
Supplement: pone.0177281.s002.pdf [file pone.0177281.s002.pdf]

**S2 Fig. Kaplan-Meier plot showing the probability of ART failure as a function of time for participants with ENV1 HRM scores above vs. below the median.**

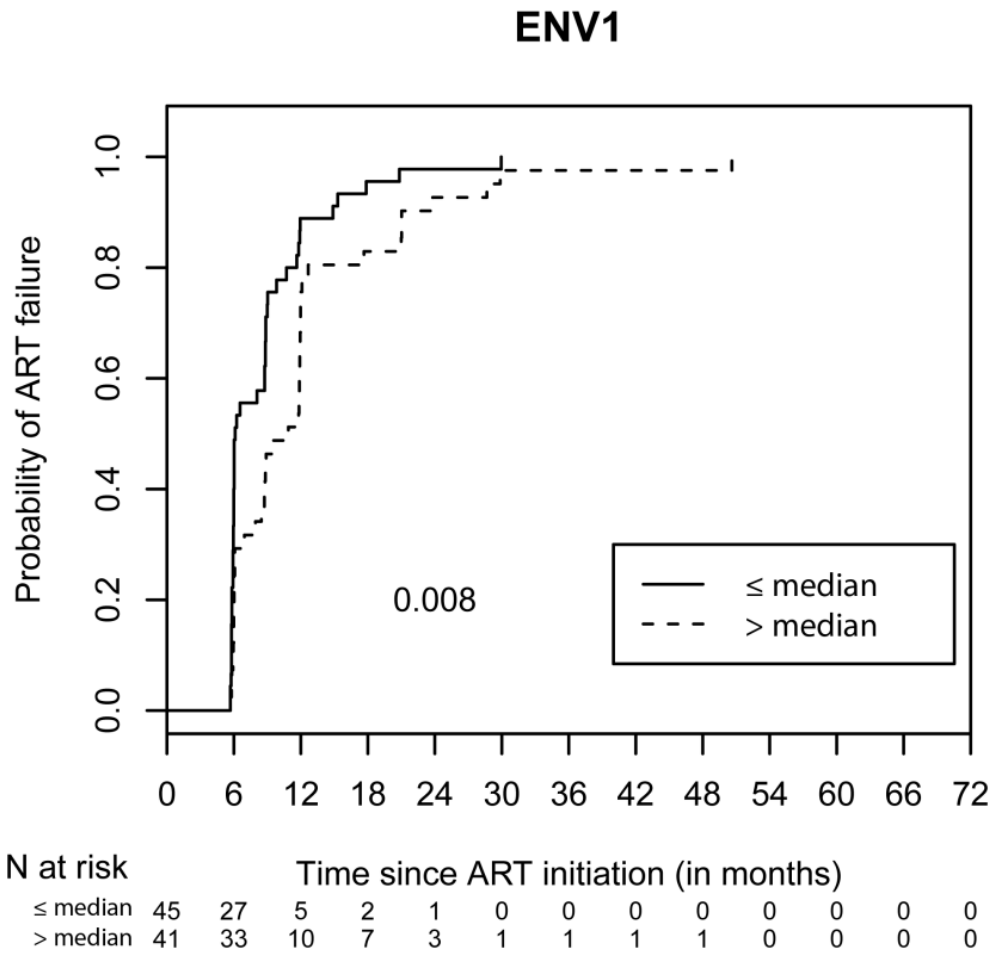

**Legend for S2 Fig**

Kaplan-Meier plot showing the association of higher ENV1 HRM score (>median) with longer time to antiretroviral (ART) failure. The numbers below the graph indicate the number (N) of participants failing ART per time point.
