# Supplementary material for: Association of HIV diversity and virologic outcomes in early antiretroviral treatment: HPTN 052
Source: PubMed Central journal article supplement (PMC5421787; doi:10.1371/journal.pone.0177281), 2017-05-08
Supplement: pone.0177281.s003.pdf [file pone.0177281.s003.pdf]

## S1 Table. Affiliated IRBs/ECs and Regulatory Bodies by Site.

The table below outlines all associated Institutional Review Boards (IRBs)/Ethics Committees for each clinical research site. In some cases, a local site partnered with an institution in the United States (US) to conduct HPTN 052. In those cases, a US IRB also had a responsibility to review and approve the research. The table also includes non-US regulatory bodies that reviewed the study (for example local Ministries of Health, Poisons Boards, etc.).

| Site                       | Affiliated IRBs/ECs and Regulatory Bodies                                                                                                                                                                                                                                                                                                                                                                                 |
|----------------------------|---------------------------------------------------------------------------------------------------------------------------------------------------------------------------------------------------------------------------------------------------------------------------------------------------------------------------------------------------------------------------------------------------------------------------|
| Porto Alegre, Brazil       | <ul style="list-style-type: none"> <li>UCLA Office for Protection of Research Subjects: Medical Institutional Review Board</li> <li>Brazil Ministério da Saúde: CONEP: Comissão Nacional de Ética em Pesquisa</li> <li>Gerencia de Ensino e Pesquisa: Comitê de Ética em Pesquisa do Grupo Hospitalar Conceição-GHC</li> </ul>                                                                                            |
| Rio de Janeiro, Brazil     | <ul style="list-style-type: none"> <li>UCLA Office for Protection of Research Subjects: Medical Institutional Review Board</li> <li>Instituto de Pesquisa Clínica Evandro Chagas: Comitê de Ética em Pesquisa</li> <li>Brazil Ministério da Saúde: CONEP: Comissão Nacional de Ética em Pesquisa</li> <li>Grupo Hospitalar Conceição-GHC: Comitê de Ética em Pesquisa</li> </ul>                                          |
| Boston, MA, USA            | <ul style="list-style-type: none"> <li>Fenway Community Health Center: Fenway Community Health Center Institutional Review Board</li> </ul>                                                                                                                                                                                                                                                                               |
| Chennai, India             | <ul style="list-style-type: none"> <li>Fenway Community Health Center: Fenway Community Health Center Institutional Review Board</li> <li>YRG CARE Institutional Review Board</li> <li>University of California, San Diego: Human Research Protections Program</li> <li>Health Ministry Screening Committee (India)</li> </ul>                                                                                            |
| Pune, India                | <ul style="list-style-type: none"> <li>National AIDS Research Institute: National AIDS Research Institute (NARI) Ethics Committee</li> <li>Johns Hopkins University School of Medicine: Johns Hopkins Medicine Institutional Review Board</li> <li>Health Ministry Screening Committee (India)</li> </ul>                                                                                                                 |
| Chiang Mai, Thailand       | <ul style="list-style-type: none"> <li>Johns Hopkins Bloomberg School of Public Health Institutional Review Boards</li> <li>Human Experimentation Committee, Research Institute for Health Sciences, Chiang Mai University</li> <li>Research Ethics Committee, Faculty of Medicine, Chiang Mai University</li> <li>Ethical Review Committee for Research in Human Subjects Ministry of Public Health, Thailand</li> </ul> |
| Kisumu, Kenya              | <ul style="list-style-type: none"> <li>Kenya Medical Research Institute: KEMRI National Ethical Review Committee</li> <li>CDC Atlanta: CDC National Center for HIV/AIDS, Viral Hepatitis, STDs and TB Prevention IRB</li> <li>Pharmacy and Poisons Board (Kenya)</li> </ul>                                                                                                                                               |
| Harare, Zimbabwe           | <ul style="list-style-type: none"> <li>University of California at San Francisco: Committee on Human Research, Office of Research Administration</li> <li>Medical Research Council of Zimbabwe: Medical Research Council of Zimbabwe (MRCZ) Institutional Review Board</li> </ul>                                                                                                                                         |
| Blantyre, Malawi           | <ul style="list-style-type: none"> <li>University of Malawi College of Medicine: College of Medicine Research &amp; Ethics Committee (COMREC)</li> <li>Johns Hopkins University Bloomberg School of Public Health: Institutional Review Board</li> </ul>                                                                                                                                                                  |
| Lilongwe, Malawi           | <ul style="list-style-type: none"> <li>Malawi Ministry of Health &amp; Population: National Health Sciences Research Committee</li> <li>University of North Carolina School of Medicine: Committee on the Protection of the Rights of Human Subjects</li> </ul>                                                                                                                                                           |
| Gaborone, Botswana         | <ul style="list-style-type: none"> <li>Botswana Ministry of Health: Health Research and Development Committee</li> <li>Harvard School of Public Health: Human Subjects Committee</li> </ul>                                                                                                                                                                                                                               |
| Johannesburg, South Africa | <ul style="list-style-type: none"> <li>University of Witwatersrand: Human Research Ethics Committee: Medical</li> <li>Medicines Control Council (South Africa)</li> </ul>                                                                                                                                                                                                                                                 |
| Soweto, South Africa       | <ul style="list-style-type: none"> <li>University of Witwatersrand: Human Research Ethics Committee: Medical</li> <li>Medicines Control Council (South Africa)</li> </ul>                                                                                                                                                                                                                                                 |
| HPTN Laboratory Center     | <ul style="list-style-type: none"> <li>Johns Hopkins University School of Medicine eIRB2</li> </ul>                                                                                                                                                                                                                                                                                                                       |
