# Supplementary material for: Association of HIV diversity and virologic outcomes in early antiretroviral treatment: HPTN 052
Source: PubMed Central journal article supplement (PMC5421787; doi:10.1371/journal.pone.0177281), 2017-05-08
Supplement: pone.0177281.s004.pdf [file pone.0177281.s004.pdf]

**S2 Table. High resolution melting (HRM) scores, HIV subtype, and geographical region of HIV-infected adults analyzed using the HRM diversity assay in HPTN 052.**

| #  | HIV Subtype | Region        | Resistance (yes/no) | Days to failure | HRM gag1 | HRM gag2 | HRM pol | HRM env1 | HRM env2 | HRM env3 |
|----|-------------|---------------|---------------------|-----------------|----------|----------|---------|----------|----------|----------|
| 1  | C           | Africa        | no                  | 361             | 6.0      | 5.5      | 3.5     | 4.4      | 4.2      | 7.9      |
| 2  | A1          | Africa        | n/a                 | 269             | 9.1      | 4.9      | 5.8     | 5.7      | 5.2      | 5.6      |
| 3  | A1          | Africa        | no                  | 267             | 4.7      | 7.0      | 3.6     | 4.0      | 4.6      | 5.1      |
| 4  | A2          | Africa        | no                  | 359             | 6.1      | 11.5     | 5.8     | 4.8      | 5.2      | 8.5      |
| 5  | A1          | Africa        | no                  | 176             | 4.9      | 5.0      | 4.0     | 4.0      | 4.2      | 6.1      |
| 6  | C           | Africa        | no                  | 210             | 5.4      | 5.7      | 5.5     | 4.7      | 4.2      | 4.5      |
| 7  | C           | Africa        | no                  | 357             | 4.5      | 4.8      | 4.3     | 6.1      | 4.9      | 4.5      |
| 8  | C           | Africa        | no                  | 181             | 5.6      | 6.7      | 5.8     | 5.3      | 3.8      | 6.4      |
| 9  | C           | Africa        | no                  | 180             | 5.1      | 4.8      | 6.1     | 5.8      | 4.1      | 3.6      |
| 10 | C           | Africa        | no                  | 182             | 6.4      | 6.5      | 6.0     | 4.3      | 5.1      | 5.6      |
| 11 | C           | Africa        | no                  | 185             | 4.5      | 5.3      | 7.3     | 4.0      | 5.7      | 5.7      |
| 12 | C           | Asia          | yes                 | 264             | 5.3      | 5.6      | 4.9     | 4.7      | 6.1      | 4.7      |
| 13 | C           | Asia          | yes                 | 636             | 9.5      | 3.9      | 7.2     | 5.7      | 4.5      | 5.1      |
| 14 | C           | Asia          | yes                 | 357             | 10.1     | 11.6     | 6.2     | 4.1      | 5.1      | 8.4      |
| 15 | C           | Asia          | no                  | 362             | 4.4      | 6.5      | 3.1     | 5.5      | 5.4      | 5.7      |
| 16 | C           | Asia          | yes                 | 297             | 6.4      | 9.6      | 4.7     | 4.1      | 5.6      | 7.0      |
| 17 | n/a         | Asia          | n/a                 | 720             | 6.6      | 4.8      | 6.1     | 4.8      | 4.2      | 5.3      |
| 18 | C           | Asia          | no                  | 181             | 6.3      | 6.0      | 5.8     | 5.0      | 3.9      | 4.4      |
| 19 | C           | Asia          | yes                 | 906             | 5.9      | 8.8      | 5.2     | 4.3      | 4.4      | 5.2      |
| 20 | C           | Asia          | no                  | 181             | 8.0      | 6.9      | 5.8     | 7.7      | 5.4      | 6.0      |
| 21 | C           | Asia          | no                  | 176             | 6.1      | 10.3     | 4.8     | 4.4      | 6.3      | 7.1      |
| 22 | C           | Asia          | no                  | 175             | 6.9      | 6.1      | 5.5     | 4.1      | 5.6      | 5.2      |
| 23 | C           | Asia          | no                  | 175             | 5.9      | 7.0      | 5.9     | 3.9      | 4.9      | 5.5      |
| 24 | C           | Asia          | no                  | 268             | 6.2      | 4.2      | 4.8     | 4.1      | 4.9      | 5.1      |
| 25 | C           | Asia          | no                  | 267             | 5.8      | 6.8      | 4.7     | 6.8      | 6.7      | 4.7      |
| 26 | C           | Asia          | no                  | 288             | 5.9      | 10.3     | 4.3     | 5.2      | 3.7      | 5.9      |
| 27 | C           | Asia          | no                  | 366             | 5.5      | 7.3      | 3.1     | 5.2      | 7.4      | 4.6      |
| 28 | C           | Asia          | no                  | 181             | 7.6      | 8.7      | 4.9     | 4.3      | 5.1      | 6.7      |
| 29 | C           | Asia          | no                  | 360             | 7.7      | 7.9      | 4.4     | 4.9      | 8.6      | 9.7      |
| 30 | C           | Asia          | yes                 | 184             | 5.0      | 5.7      | 4.8     | 4.7      | 5.0      | 6.1      |
| 31 | C           | Asia          | no                  | 182             | 6.4      | 6.0      | 5.7     | 4.1      | 5.1      | 5.9      |
| 32 | C           | Asia          | no                  | 867             | 4.4      | 11.0     | 6.0     | 5.2      | 4.2      | 6.4      |
| 33 | C           | Asia          | yes                 | 329             | 5.0      | 6.1      | 4.0     | 5.5      | 5.4      | 6.4      |
| 34 | C           | Asia          | no                  | 540             | 6.9      | 4.0      | 5.9     | 4.0      | 4.4      | 5.5      |
| 35 | C           | Asia          | no                  | 267             | 4.7      | 9.9      | 4.8     | 4.3      | 3.7      | 5.4      |
| 36 | C           | Asia          | no                  | 175             | 8.3      | 5.9      | 6.5     | 7.8      | 5.6      | 4.9      |
| 37 | CRF1_AE     | Asia          | no                  | 180             | 4.3      | 5.8      | 4.9     | 4.1      | 3.7      | 5.6      |
| 38 | C           | South America | no                  | 362             | 5.5      | 4.7      | 5.4     | 6.5      | 3.7      | 7.6      |
| 39 | C           | South America | yes                 | 182             | 5.1      | 9.4      | 5.5     | 5.3      | 4.3      | 5.3      |
| 40 | C           | South America | no                  | 182             | 8.5      | 3.3      | 3.6     | 4.3      | 3.8      | 6.4      |
| 41 | B           | South America | yes                 | 268             | 6.1      | 5.7      | 5.3     | 4.2      | 5.4      | 4.7      |

|    |     |               |     |      |     |      |     |     |     |     |
|----|-----|---------------|-----|------|-----|------|-----|-----|-----|-----|
| 42 | F1  | South America | yes | 189  | 6.1 | 5.3  | 6.4 | 4.4 | 4.6 | 8.7 |
| 43 | F1  | South America | no  | 175  | 4.5 | 5.0  | 3.8 | 3.7 | 4.7 | 4.6 |
| 44 | B   | South America | no  | 175  | 6.6 | 5.0  | 4.2 | 3.8 | 7.6 | 5.6 |
| 45 | B   | South America | no  | 265  | 6.0 | 5.2  | 4.3 | 3.6 | 5.8 | 5.6 |
| 46 | F1  | South America | no  | 179  | 5.2 | 5.2  | 5.4 | 4.6 | 4.5 | 3.0 |
| 47 | B   | South America | no  | 184  | 9.6 | 5.6  | 5.6 | 5.2 | 6.5 | 6.5 |
| 48 | B   | South America | n/a | 534  | 5.9 | 10.1 | 4.9 | 4.9 | 4.4 | 7.4 |
| 49 | URF | South America | no  | 352  | 4.5 | 6.5  | 4.2 | 4.1 | 5.0 | 6.1 |
| 50 | F1  | South America | no  | 383  | 6.1 | 7.9  | 6.0 | 5.0 | 5.8 | 5.4 |
| 51 | B   | South America | yes | 174  | 5.4 | 7.3  | 4.3 | 4.6 | 7.6 | 5.5 |
| 52 | B   | South America | no  | 360  | 5.7 | 7.9  | 5.0 | 4.9 | 6.0 | 8.8 |
| 53 | B   | South America | no  | 362  | 5.7 | 7.6  | 5.3 | 5.7 | 7.8 | 5.8 |
| 54 | B   | South America | yes | 181  | 4.9 | 5.4  | 4.9 | 4.5 | 5.8 | 4.1 |
| 55 | C   | Africa        | yes | 360  | 5.1 | 4.4  | 4.0 | 3.6 | 4.1 | 4.5 |
| 56 | C   | Africa        | no  | 903  | 4.8 | 4.8  | 4.6 | 5.2 | 4.0 | 5.4 |
| 57 | C   | Africa        | yes | 630  | 5.1 | 6.6  | 4.4 | 4.5 | 4.3 | 5.5 |
| 58 | C   | Africa        | yes | 176  | 4.9 | 5.2  | 4.2 | 4.6 | 4.3 | 5.0 |
| 59 | C   | Africa        | no  | 198  | 4.7 | 4.2  | 3.7 | 4.5 | 5.8 | 4.7 |
| 60 | C   | Africa        | yes | 179  | 5.0 | 5.4  | 3.3 | 3.7 | 3.9 | 4.6 |
| 61 | C   | Africa        | no  | 266  | 8.0 | 10.0 | 6.3 | 4.8 | 8.0 | 9.0 |
| 62 | C   | Africa        | no  | 635  | 4.4 | 9.9  | 7.3 | 6.0 | 4.0 | 5.7 |
| 63 | C   | Africa        | no  | 256  | 4.9 | 5.6  | 5.3 | 5.0 | 5.7 | 4.2 |
| 64 | C   | Africa        | yes | 273  | 5.5 | 6.6  | 3.9 | 4.2 | 4.4 | 4.7 |
| 65 | C   | Africa        | no  | 182  | 6.0 | 5.7  | 5.5 | 3.8 | 4.3 | 5.2 |
| 66 | C   | Africa        | no  | 358  | 6.7 | 6.7  | 6.6 | 5.2 | 5.4 | 5.8 |
| 67 | C   | Africa        | yes | 181  | 4.5 | 4.5  | 4.1 | 3.6 | 3.9 | 3.9 |
| 68 | C   | Africa        | no  | 450  | 5.9 | 6.6  | 3.8 | 4.4 | 5.3 | 6.1 |
| 69 | C   | Africa        | no  | 182  | 7.7 | 7.2  | 4.3 | 5.4 | 4.3 | 8.1 |
| 70 | C   | Africa        | yes | 265  | 4.5 | 6.1  | 4.7 | 4.0 | 3.8 | 4.6 |
| 71 | C   | Africa        | no  | 359  | 5.9 | 5.4  | 6.7 | 6.4 | 7.2 | 5.3 |
| 72 | C   | Africa        | yes | 180  | 4.4 | 4.8  | 4.6 | 3.8 | 4.0 | 4.1 |
| 73 | C   | Africa        | yes | 179  | 5.0 | 5.4  | 5.4 | 5.3 | 4.9 | 5.0 |
| 74 | C   | Africa        | yes | 272  | 6.3 | 6.1  | 4.9 | 4.3 | 8.4 | 4.5 |
| 75 | C   | Africa        | yes | 240  | 8.3 | 7.1  | 5.5 | 5.7 | 4.0 | 5.9 |
| 76 | C   | Africa        | no  | 1531 | 6.1 | 6.2  | 6.0 | 5.0 | 7.6 | 4.0 |
| 77 | C   | Africa        | no  | 172  | 4.5 | 5.5  | 4.9 | 4.3 | 5.7 | 4.4 |
| 78 | C   | Africa        | yes | 244  | 6.0 | 4.8  | 5.2 | 4.1 | 4.4 | 6.3 |
| 79 | C   | Africa        | yes | 176  | 6.3 | 5.2  | 4.9 | 4.8 | 7.2 | 6.2 |
| 80 | C   | Africa        | no  | 361  | 6.8 | 4.9  | 3.7 | 4.9 | 4.3 | 5.2 |
| 81 | C   | Africa        | yes | 324  | 4.8 | 4.6  | 4.5 | 3.8 | 4.3 | 8.3 |
| 82 | C   | Africa        | no  | 463  | 5.9 | 4.0  | 3.7 | 3.4 | 4.9 | 7.5 |
| 83 | C   | Africa        | no  | 179  | 6.4 | 4.8  | 3.8 | 3.9 | 3.7 | 4.2 |
| 84 | C   | Africa        | yes | 172  | 4.7 | 4.3  | 4.0 | 4.3 | 3.9 | 4.3 |
| 85 | C   | Africa        | no  | 636  | 6.1 | 4.4  | 4.2 | 4.9 | 4.6 | 5.2 |
| 86 | C   | Africa        | no  | 172  | 4.6 | 8.7  | 4.3 | 4.8 | 5.5 | 5.9 |

Note: For access to additional data, please contact the corresponding author as these data are not yet publically available. CRF: circulating recombinant form; URF: unique recombinant form.
