# Supplementary material for: Association of HIV diversity and virologic outcomes in early antiretroviral treatment: HPTN 052
Source: PubMed Central journal article supplement (PMC5421787; doi:10.1371/journal.pone.0177281), 2017-05-08
Supplement: pone.0177281.s005.pdf [file pone.0177281.s005.pdf]

**S3 Table. Enrollment (baseline) characteristics of the study cohort (N=95).\***

| Variables                                          | Included<br>N=86 | Excluded<br>N=9 | p-value |
|----------------------------------------------------|------------------|-----------------|---------|
| Sex                                                |                  |                 | 0.41    |
| Male                                               | 45 (52.3%)       | 6 (66.7%)       |         |
| Female                                             | 41 (47.7%)       | 3 (33.3%)       |         |
| Age                                                |                  |                 | 0.68    |
| <25 years                                          | 12 (14.0%)       | 2 (22.2%)       |         |
| 25-39 years                                        | 56 (65.1%)       | 6 (66.7%)       |         |
| ≥40 years                                          | 18 (20.9%)       | 1 (11.1%)       |         |
| Education                                          |                  |                 | 0.52    |
| None                                               | 16 (18.6%)       | 2 (22.2%)       |         |
| Primary or secondary schooling                     | 67 (77.9%)       | 6 (66.7%)       |         |
| Post-secondary schooling                           | 3 (3.5%)         | 1 (11.1%)       |         |
| Geographical region                                |                  |                 | 0.18    |
| South America                                      | 17 (19.8%)       | 0 (0.0%)        |         |
| Asia                                               | 26 (30.2%)       | 5 (55.6%)       |         |
| Africa                                             | 43 (50.0%)       | 4 (44.4%)       |         |
| CD4 (per 100 CD4 cells/mm <sup>3</sup> increments) |                  |                 | 0.94    |
| Median (IQR)                                       | 462 (371, 535)   | 445 (413, 528)  |         |
| VL (per unit log <sub>10</sub> increment)          |                  |                 | 0.07    |
| Median (IQR)                                       | 4.5 (4.0, 4.9)   | 3.7 (2.6, 4.4)  |         |
| Antiretroviral drug resistance at baseline         |                  |                 | 0.42    |
| Missing                                            | 4 (4.7%)         | 2 (22.2%)       |         |
| No                                                 | 75 (87.2%)       | 7 (77.8%)       |         |
| Yes                                                | 7 (8.1%)         | 0 (0.0%)        |         |
| PMTCT                                              |                  |                 | 0.77    |
| No                                                 | 26 (74.3%)       | 2 (66.7%)       |         |
| Yes                                                | 9 (25.7%)        | 1 (33.3%)       |         |
| Number of sex partners                             |                  |                 | 0.51    |
| 1                                                  | 82 (95.3%)       | 9 (100.0%)      |         |
| >1                                                 | 4 (4.7%)         | 0 (0.0%)        |         |

**Footnotes for S3 Table**

Abbreviations: IQR: interquartile range; VL: viral load; PMTCT: prevention of mother-to-child transmission.

\*Chi-square test was used for categorical variables and Wilcoxon rank sum test was used for continuous variables.
